# Supplementary material for: Sex Disparities in Long-Term Mortality after Paclitaxel Exposure in Patients with Peripheral Artery Disease: A Nationwide Claims-Based Cohort Study
Source: MDPI journal article supplement (doi:10.3390/jcm10132978), 2021-07-02
Supplement: s1 [file s1]

## Supplemental Material

*Supplemental Table S1: Baseline characteristics of randomised controlled trials included in two systematic reviews in 2018 and 2020 vs. the current study.*

| Name                     | N   | Age (y)   | Male       | Smoking    | Diabetes   | IC         |
|--------------------------|-----|-----------|------------|------------|------------|------------|
| <i>Above the knee</i>    |     |           |            |            |            |            |
| ZILVER PTX               | 479 | 68        | 64%        | 84%        | 45%        | 90%        |
| THUNDER                  | 102 | 68        | 64%        | 23%        | 48%        | 80%        |
| INPACT SFA               | 331 | 68        | 66%        | 38%        | 43%        | 95%        |
| FEMPAC                   | 87  | 69        | 60%        | 41%        | 47%        | 94%        |
| LEVANT I                 | 101 | 69        | 63%        | 35%        | 48%        | 93%        |
| LEVANT II                | 476 | 68        | 63%        | 35%        | 43%        | 92%        |
| ILLUMENATE EU            | 294 | 68        | 71%        | 88%        | 37%        | 98%        |
| CONSEQUENT               | 153 | 68        | 68%        | 48%        | 37%        | 100%       |
| ISAR-STATH               | 100 | 69        | 70%        | 70%        | 25%        | 93%        |
| IN.PACT SFA JAPAN        | 100 | 73        | 76%        | 28%        | 96%        | 96%        |
| DEBELLUM                 | 50  | 67        | 74%        | 62%        | 44%        | 90%        |
| PACIFIER                 | 91  | 71        | 62%        | 54%        | 35%        | 96%        |
| ISAR-PEBIS               | 70  | 69        | 69%        | 64%        | 34%        | 97%        |
| FAIR                     | 119 | 68        | 69%        | 32%        | 38%        | 92%        |
| BIOLUX P-I               | 60  | 71        | 57%        | 68%        | 33%        | 83%        |
| RANGER-SFA               | 105 | 68        | 72%        | 44%        | 38%        | 97%        |
| ACOART I                 | 200 | 66        | 74%        | 31%        | 56%        | 63%        |
| DEBATE IN SFA            | 104 | 75        | 69%        | 52%        | 74%        | 26%        |
| ILLUMENATE PIVOTAL       | 300 | 69        | 59%        | 81%        | 50%        | 96%        |
| LUTONIX JAPAN            | 109 | 74        | 83%        | 72%        | 77%        | 99%        |
| RAPID                    | 160 | 68        | 64%        | 49%        | 29%        | 83%        |
| EFFPAC                   | 171 | 68        | 65%        | N/A        | 39%        | 98%        |
| FINN-PTX                 | 41  | 68        | 71%        | 37%        | 37%        | 83%        |
| BATTLE                   | 171 | 70        | 73%        | 28%        | 37%        | 81%        |
| DEBATE-SFA               | 255 | 73        | 67%        | 25%        | 55%        | 88%        |
| PACUBA                   | 74  | 68        | 58%        | 47%        | 41%        | 99%        |
| DRECOREST                | 57  | 68        | 56%        | 54%        | 49%        | 54%        |
| FREEWAY                  | 204 | 65        | 77%        | 85%        | 26%        | 95%        |
| <b>Weighted mean</b>     |     | <b>69</b> | <b>67%</b> | <b>54%</b> | <b>45%</b> | <b>89%</b> |
| <i>Below the knee</i>    |     |           |            |            |            |            |
| <b>The current study</b> |     | <b>74</b> | <b>46%</b> | <b>23%</b> | <b>35%</b> | <b>58%</b> |
| DEBATE BTK               | 132 | 75        | 80%        | 15%        | 100%       | 0%         |
| INPACT DEEP              | 358 | 73        | 74%        | 15%        | 73%        | 0%         |
| BIOLUX P-II              | 72  | 72        | 79%        | 14%        | 67%        | 22%        |
| ACOART II                | 120 | 71        | 60%        | 27%        | 73%        | 1%         |
| ACOART BTK               | 85  | 77        | 73%        | N/A        | 95%        | 0%         |
| SINGA-PACLI              | 138 | 69        | 67%        | 36%        | 94%        | 0%         |
| LUTONIX BTK              | 442 | 73        | 69%        | 14%        | 70%        | 10%        |
| HADDAD ET AL             | 93  | N/A       | N/A        | 73%        | 96%        | 0%         |
| <b>Weighted mean</b>     |     | <b>73</b> | <b>71%</b> | <b>22%</b> | <b>79%</b> | <b>4%</b>  |
| <b>The current study</b> |     | <b>74</b> | <b>46%</b> | <b>23%</b> | <b>35%</b> | <b>58%</b> |

*Footnote: IC = Intermittent Claudication.*

Supplemental Table S2: International classification of diseases (ICD) 10th revision, operational and procedure coding (OPS), and anatomical-therapeutical-chemical (ATC) classification used for this study.

| Variable                                          | ICD code (or OPS or ATC if indicated)                                                                                                                                                                                                                                                                                                                                                                                                                                                                                                                                                                                                                                                                                                                                                                                                                                                                                                                                                                                                                                                                                                                                                                                                                                                                                                                                                                                                                                                                                                                                                                                                                                                                                                                                                                                                                          |
|---------------------------------------------------|----------------------------------------------------------------------------------------------------------------------------------------------------------------------------------------------------------------------------------------------------------------------------------------------------------------------------------------------------------------------------------------------------------------------------------------------------------------------------------------------------------------------------------------------------------------------------------------------------------------------------------------------------------------------------------------------------------------------------------------------------------------------------------------------------------------------------------------------------------------------------------------------------------------------------------------------------------------------------------------------------------------------------------------------------------------------------------------------------------------------------------------------------------------------------------------------------------------------------------------------------------------------------------------------------------------------------------------------------------------------------------------------------------------------------------------------------------------------------------------------------------------------------------------------------------------------------------------------------------------------------------------------------------------------------------------------------------------------------------------------------------------------------------------------------------------------------------------------------------------|
| Symptomatic peripheral arterial occlusive disease | <p><b>&lt;2015:</b><br/> I70.21 Pelvic-leg arteries with exercise induced pain, walking distance &lt; 200m, <b>Fontaine stage II</b><br/> I70.22 Pelvic-leg arteries with rest pain, <b>Fontaine stage III</b><br/> I70.23-24 Pelvic-leg arteries with ulcerations and/or gangrene, <b>Fontaine stage IV</b><br/> <b>≥ 2015:</b><br/> I70.21-22 Pelvic-leg arteries with exercise induced pain, <b>Fontaine stage II</b><br/> I70.23 Pelvic-leg arteries with rest pain, <b>Fontaine stage III</b><br/> I70.24-25 Pelvic-leg arteries with ulcerations and/or gangrene, <b>Fontaine stage IV</b><br/> <b>Others:</b><br/> E10.50-51 Type 1 diabetes mellitus with peripheral vascular complications<br/> E10.7 Type 1 diabetes mellitus with diabetic foot syndrome<br/> E11.50-51 Type 2 diabetes mellitus with peripheral vascular complications<br/> E11.7 Type 2 diabetes mellitus with diabetic foot syndrome<br/> I73.0 Other peripheral vascular diseases, Raynaud syndrome<br/> I73.1 Other peripheral vascular diseases, Thrombangiitis obliterans<br/> I73.8 Other peripheral vascular diseases<br/> I73.9 Other peripheral vascular diseases<br/> I74.0 Arterial embolism and thrombosis, aorta abdominalis<br/> I74.1 Arterial embolism and thrombosis, aorta<br/> I74.2 Arterial embolism and thrombosis, upper extremities<br/> I74.3 Arterial embolism and thrombosis, lower extremities<br/> I74.4 Arterial embolism and thrombosis, arteries of the extremities<br/> I74.5 Arterial embolism and thrombosis, aorta iliacal<br/> I74.8 Arterial embolism and thrombosis, other arteries<br/> I74.9 Arterial embolism and thrombosis, other arteries<br/> L03.01-2, L03.11 Cellulitis of finger and toe including acute lymphangitis<br/> L98.4 Chronic ulcer of skin, not elsewhere classified<br/> R02 Gangrene, not elsewhere classified</p> |
| <b>Interventions</b>                              |                                                                                                                                                                                                                                                                                                                                                                                                                                                                                                                                                                                                                                                                                                                                                                                                                                                                                                                                                                                                                                                                                                                                                                                                                                                                                                                                                                                                                                                                                                                                                                                                                                                                                                                                                                                                                                                                |
| Amputation                                        | OPS 5-864 Major amputation, above the ankle<br>5-865 Minor amputation, below the ankle                                                                                                                                                                                                                                                                                                                                                                                                                                                                                                                                                                                                                                                                                                                                                                                                                                                                                                                                                                                                                                                                                                                                                                                                                                                                                                                                                                                                                                                                                                                                                                                                                                                                                                                                                                         |
| Percutaneous coronary intervention                | 8-837, 5-38a.c                                                                                                                                                                                                                                                                                                                                                                                                                                                                                                                                                                                                                                                                                                                                                                                                                                                                                                                                                                                                                                                                                                                                                                                                                                                                                                                                                                                                                                                                                                                                                                                                                                                                                                                                                                                                                                                 |
| Peripheral vascular intervention                  | 8-836, 8-840, 8-841, 8-842, 8-843, 8-844, 8-845, 8-846, 8-847, 8-848, 8-849, 8-83c, 8-84a                                                                                                                                                                                                                                                                                                                                                                                                                                                                                                                                                                                                                                                                                                                                                                                                                                                                                                                                                                                                                                                                                                                                                                                                                                                                                                                                                                                                                                                                                                                                                                                                                                                                                                                                                                      |
| Open surgical revascularization                   | 5-380, 5-381, 5-382, 5-383, 5-384, 5-38c, 5-38d, 5-38e, 5-38f, 5-393, 5-394, 5-395, 5-396, 5-98a, 5-38a.4, 5-38a.c                                                                                                                                                                                                                                                                                                                                                                                                                                                                                                                                                                                                                                                                                                                                                                                                                                                                                                                                                                                                                                                                                                                                                                                                                                                                                                                                                                                                                                                                                                                                                                                                                                                                                                                                             |
| Drug-coated balloon                               | 8-83b.b0, 8-83b.b2-b5, 8-83b.ba-bd                                                                                                                                                                                                                                                                                                                                                                                                                                                                                                                                                                                                                                                                                                                                                                                                                                                                                                                                                                                                                                                                                                                                                                                                                                                                                                                                                                                                                                                                                                                                                                                                                                                                                                                                                                                                                             |
| Uncoated balloon                                  | 8-836.04/09/0b/0c/0e                                                                                                                                                                                                                                                                                                                                                                                                                                                                                                                                                                                                                                                                                                                                                                                                                                                                                                                                                                                                                                                                                                                                                                                                                                                                                                                                                                                                                                                                                                                                                                                                                                                                                                                                                                                                                                           |
| Drug-eluting stent (paclitaxel)                   | 8-840.04/9/q/b/s/c/e, 8-841.04/9/q/b/s/c/e, 8-842.04/9/q/b/s/c/e, 8-848.04/9/q/b/s/c/e, 8-83b.03-06                                                                                                                                                                                                                                                                                                                                                                                                                                                                                                                                                                                                                                                                                                                                                                                                                                                                                                                                                                                                                                                                                                                                                                                                                                                                                                                                                                                                                                                                                                                                                                                                                                                                                                                                                            |
| Drug-eluting stent (other than paclitaxel)        | 8-83b.0a-f, 8-83b.0x                                                                                                                                                                                                                                                                                                                                                                                                                                                                                                                                                                                                                                                                                                                                                                                                                                                                                                                                                                                                                                                                                                                                                                                                                                                                                                                                                                                                                                                                                                                                                                                                                                                                                                                                                                                                                                           |
| Bare metal stent                                  | 8-840.04/9/q/b/s/c/e, 8-840.14/9/q/b/s/c/e, 8-840.24/9/q/b/s/c/e, 8-840.34/9/q/b/s/c/e, 8-840.44/9/q/b/s/c/e, 8-840.54/9/q/b/s/c/e,                                                                                                                                                                                                                                                                                                                                                                                                                                                                                                                                                                                                                                                                                                                                                                                                                                                                                                                                                                                                                                                                                                                                                                                                                                                                                                                                                                                                                                                                                                                                                                                                                                                                                                                            |
| <b>Medications</b>                                |                                                                                                                                                                                                                                                                                                                                                                                                                                                                                                                                                                                                                                                                                                                                                                                                                                                                                                                                                                                                                                                                                                                                                                                                                                                                                                                                                                                                                                                                                                                                                                                                                                                                                                                                                                                                                                                                |
| Optimal pharmacological treatment                 | Lipid-Lowering drugs & antithrombotics & antihypertensives                                                                                                                                                                                                                                                                                                                                                                                                                                                                                                                                                                                                                                                                                                                                                                                                                                                                                                                                                                                                                                                                                                                                                                                                                                                                                                                                                                                                                                                                                                                                                                                                                                                                                                                                                                                                     |
| Lipid lowering drugs                              | ATC C10                                                                                                                                                                                                                                                                                                                                                                                                                                                                                                                                                                                                                                                                                                                                                                                                                                                                                                                                                                                                                                                                                                                                                                                                                                                                                                                                                                                                                                                                                                                                                                                                                                                                                                                                                                                                                                                        |
| Antithrombotics                                   | B01                                                                                                                                                                                                                                                                                                                                                                                                                                                                                                                                                                                                                                                                                                                                                                                                                                                                                                                                                                                                                                                                                                                                                                                                                                                                                                                                                                                                                                                                                                                                                                                                                                                                                                                                                                                                                                                            |
| Antihypertensives                                 | C02, C03, C07, C08, C09                                                                                                                                                                                                                                                                                                                                                                                                                                                                                                                                                                                                                                                                                                                                                                                                                                                                                                                                                                                                                                                                                                                                                                                                                                                                                                                                                                                                                                                                                                                                                                                                                                                                                                                                                                                                                                        |
| Oral anticoagulation                              | B01AA, B01AE, B01AF                                                                                                                                                                                                                                                                                                                                                                                                                                                                                                                                                                                                                                                                                                                                                                                                                                                                                                                                                                                                                                                                                                                                                                                                                                                                                                                                                                                                                                                                                                                                                                                                                                                                                                                                                                                                                                            |
| <b>Covariates</b>                                 |                                                                                                                                                                                                                                                                                                                                                                                                                                                                                                                                                                                                                                                                                                                                                                                                                                                                                                                                                                                                                                                                                                                                                                                                                                                                                                                                                                                                                                                                                                                                                                                                                                                                                                                                                                                                                                                                |
| Stroke or transient ischaemic attack              | I61, I63, I64, G45                                                                                                                                                                                                                                                                                                                                                                                                                                                                                                                                                                                                                                                                                                                                                                                                                                                                                                                                                                                                                                                                                                                                                                                                                                                                                                                                                                                                                                                                                                                                                                                                                                                                                                                                                                                                                                             |
| Dyslipidaemia                                     | E78                                                                                                                                                                                                                                                                                                                                                                                                                                                                                                                                                                                                                                                                                                                                                                                                                                                                                                                                                                                                                                                                                                                                                                                                                                                                                                                                                                                                                                                                                                                                                                                                                                                                                                                                                                                                                                                            |
| Coronary artery disease                           | I20-25                                                                                                                                                                                                                                                                                                                                                                                                                                                                                                                                                                                                                                                                                                                                                                                                                                                                                                                                                                                                                                                                                                                                                                                                                                                                                                                                                                                                                                                                                                                                                                                                                                                                                                                                                                                                                                                         |
| Smoking                                           | F17                                                                                                                                                                                                                                                                                                                                                                                                                                                                                                                                                                                                                                                                                                                                                                                                                                                                                                                                                                                                                                                                                                                                                                                                                                                                                                                                                                                                                                                                                                                                                                                                                                                                                                                                                                                                                                                            |
| Myocardial infarction                             | I20.0, I21-I24                                                                                                                                                                                                                                                                                                                                                                                                                                                                                                                                                                                                                                                                                                                                                                                                                                                                                                                                                                                                                                                                                                                                                                                                                                                                                                                                                                                                                                                                                                                                                                                                                                                                                                                                                                                                                                                 |
| Frailty                                           | A04, A09, A41, B95, B96, D64, E05, E16, E53, E55, E83, E87, F00, F01, F03, F05, F10, F32, G20, G30, G31, G40, G45, G81, H54, H91, I63, I67, I69, I95, J18, J22, J69, K26, K52, K59, K92, L03, L08, L89, L97, M15, M19, M25, M41, M48, M79, M80, M81, N17, N18, N19, N20, N28, N39, R00, R02, R11, R13, R26, R29, R31, R32, R33, R40, R41, R44, R45, R47, R50, R54, R55, R56, R63, R69, R79, R94, S00, S01, S06, S09, S22, S32, S42, S51, S72, S80, T83, U80, X59, Y84, Z22, Z50, Z60, Z73, Z74, Z75, Z87, Z91, Z93, Z99                                                                                                                                                                                                                                                                                                                                                                                                                                                                                                                                                                                                                                                                                                                                                                                                                                                                                                                                                                                                                                                                                                                                                                                                                                                                                                                                        |

Footnote: TIA = Transient Ischaemic Attack.

*Supplemental Table S3: Top five strongest predictors increasing or decreasing the odds of being treated with paclitaxel coated devices.*

|                                       | Females |                         |                                       | Males |                         |
|---------------------------------------|---------|-------------------------|---------------------------------------|-------|-------------------------|
|                                       | OR      | 95% confidence interval |                                       | OR    | 95% confidence interval |
| <b>Discharge Year later than 2014</b> | 2.59    | (2.27-2.95)             | <b>Discharge Year later than 2014</b> | 2.28  | (1.98-2.62)             |
| <b>High Centre Volume</b>             | 1.21    | (1.08-1.36)             | <b>High Centre Volume</b>             | 1.33  | (1.18-1.51)             |
| <b>Intermittent Claudication</b>      | 1.19    | (1.03-1.38)             | <b>Intermittent Claudication</b>      | 1.14  | (1.00-1.30)             |
| <b>Residency in East Germany</b>      | 1.16    | (1.00-1.35)             | <b>Diabetes, uncomplicated</b>        | 1.23  | (1.06-1.42)             |
| <b>Higher Age</b>                     | 0.99    | (0.97-0.99)             | <b>Higher van Walraven score</b>      | 0.99  | (0.98-0.99)             |

*Footnote: OR = Odds Ratio.*

Supplemental Table S4: Baseline characteristics by male vs. female sex of landmark sample.

|                                                                | N           | % Females                 | N           | % Males                   | SMD    |
|----------------------------------------------------------------|-------------|---------------------------|-------------|---------------------------|--------|
| <b>No of patients</b>                                          | <b>6339</b> | <b>100</b>                | <b>5493</b> | <b>100</b>                |        |
| Paclitaxel exposure at index                                   | 1464        | 23.1                      | 1225        | 22.3                      | 0.021  |
| Stent at index                                                 | 2732        | 43.1                      | 2444        | 44.5                      | 0.028  |
| Crural arteries involved                                       | 2054        | 32.4                      | 1873        | 34.1                      | 0.036  |
| Intermittent claudication                                      | 3841        | 60.6                      | 3527        | 64.2                      | 0.074  |
| Discharge year >2014                                           | 4434        | 62.2                      | 3791        | 62.4                      | 0.005  |
| High hospital volume                                           | 3736        | 52.4                      | 3177        | 52.3                      | 0.001  |
| Patient residence East Germany                                 | 1355        | 19.0                      | 1361        | 22.4                      | 0.086  |
| Prior outpatient PAOD visit                                    | 3907        | 54.8                      | 3663        | 60.3                      | 0.112# |
| Outpatient PAOD visit after index (1 year)                     | 5990        | 94.5                      | 5251        | 95.6                      | 0.052  |
| Van Walraven score >5                                          | 2859        | 45.1                      | 2335        | 42.5                      | 0.054  |
| Coronary artery disease                                        | 1350        | 21.3                      | 1747        | 31.8                      | 0.24   |
| Dyslipidaemia                                                  | 2865        | 45.2                      | 2741        | 49.9                      | 0.095  |
| History of myocardial infarction                               | 292         | 4.6                       | 313         | 5.7                       | 0.049  |
| History of stroke or TIA                                       | 431         | 6.8                       | 406         | 7.4                       | 0.025  |
| Congestive heart failure                                       | 1173        | 18.5                      | 1005        | 18.3                      | 0.004  |
| Cardiac arrhythmias                                            | 1344        | 21.2                      | 1236        | 22.5                      | 0.032  |
| Hypertension                                                   | 5293        | 83.5                      | 4367        | 79.5                      | 0.104  |
| Neurodegenerative disorders                                    | 323         | 5.1                       | 324         | 5.9                       | 0.034  |
| Chronic pulmonary disease                                      | 837         | 13.2                      | 648         | 11.8                      | 0.042  |
| Diabetes, uncomplicated                                        | 1407        | 22.2                      | 1659        | 30.2                      | 0.182  |
| Diabetes, complicated                                          | 906         | 14.3                      | 1241        | 22.6                      | 0.215  |
| Diabetes, total                                                | 1775        | 28                        | 2208        | 40.2                      | 0.259  |
| Hypothyroidism                                                 | 1376        | 21.7                      | 412         | 7.5                       | 0.411  |
| Obesity                                                        | 697         | 11                        | 720         | 13.1                      | 0.065  |
| Weight loss                                                    | 241         | 3.8                       | 110         | 2                         | 0.106  |
| Depression                                                     | 590         | 9.3                       | 313         | 5.7                       | 0.138  |
| Smoking                                                        | 1287        | 20.3                      | 1566        | 28.5                      | 0.194  |
| Optimal pharmacological therapy during the prior year          | 1192        | 18.8                      | 1467        | 26.7                      | 0.189  |
| Optimal pharmacological therapy after index (1 year)           | 3068        | 48.4                      | 3016        | 54.9                      | 0.129  |
| Oral anticoagulation during the prior year                     | 887         | 14                        | 829         | 15.1                      | 0.032  |
| Age, mean (SD)                                                 |             | 76.06 (9.95)              |             | 70.44 (10.16)             | 0.559  |
| Prior hospital visits, mean (SD)                               |             | 0.68 (1.12)               |             | 0.68 (1.15)               | <0.001 |
| No of different prescriptions during the prior year, mean (SD) |             | 9.62 (5.48)               |             | 8.77 (5.57)               | 0.154  |
| Number of surgeries at index, mean (SD)                        |             | 1.64 (1.22)               |             | 1.63 (1.33)               | 0.012  |
| Hospital length of stay, mean (SD)                             |             | 5.19 (7.80)               |             | 4.88 (8.32)               | 0.04   |
| Follow-up time, median [Q1, Q3]                                |             | 1376.00 [981.00, 1826.00] |             | 1391.00 [998.00, 1826.00] | 0.02   |

Footnote: PAOD = Peripheral arterial occlusive disease. SMD = Standardized mean differences.

TIA = Transient ischaemic attack. SD = Standard deviation. # denotes meaningful differences.
